# Supplementary material for: De novo assembly of a young Drosophila Y chromosome using single-molecule sequencing and chromatin conformation capture
Source: PLOS journal article supplement (doi:10.1371/journal.pbio.2006348), 2018-07-30
Supplement: S15 (10.1371/journal.pbio.2006348.s015) [file journal.pbio.2006348.s015]

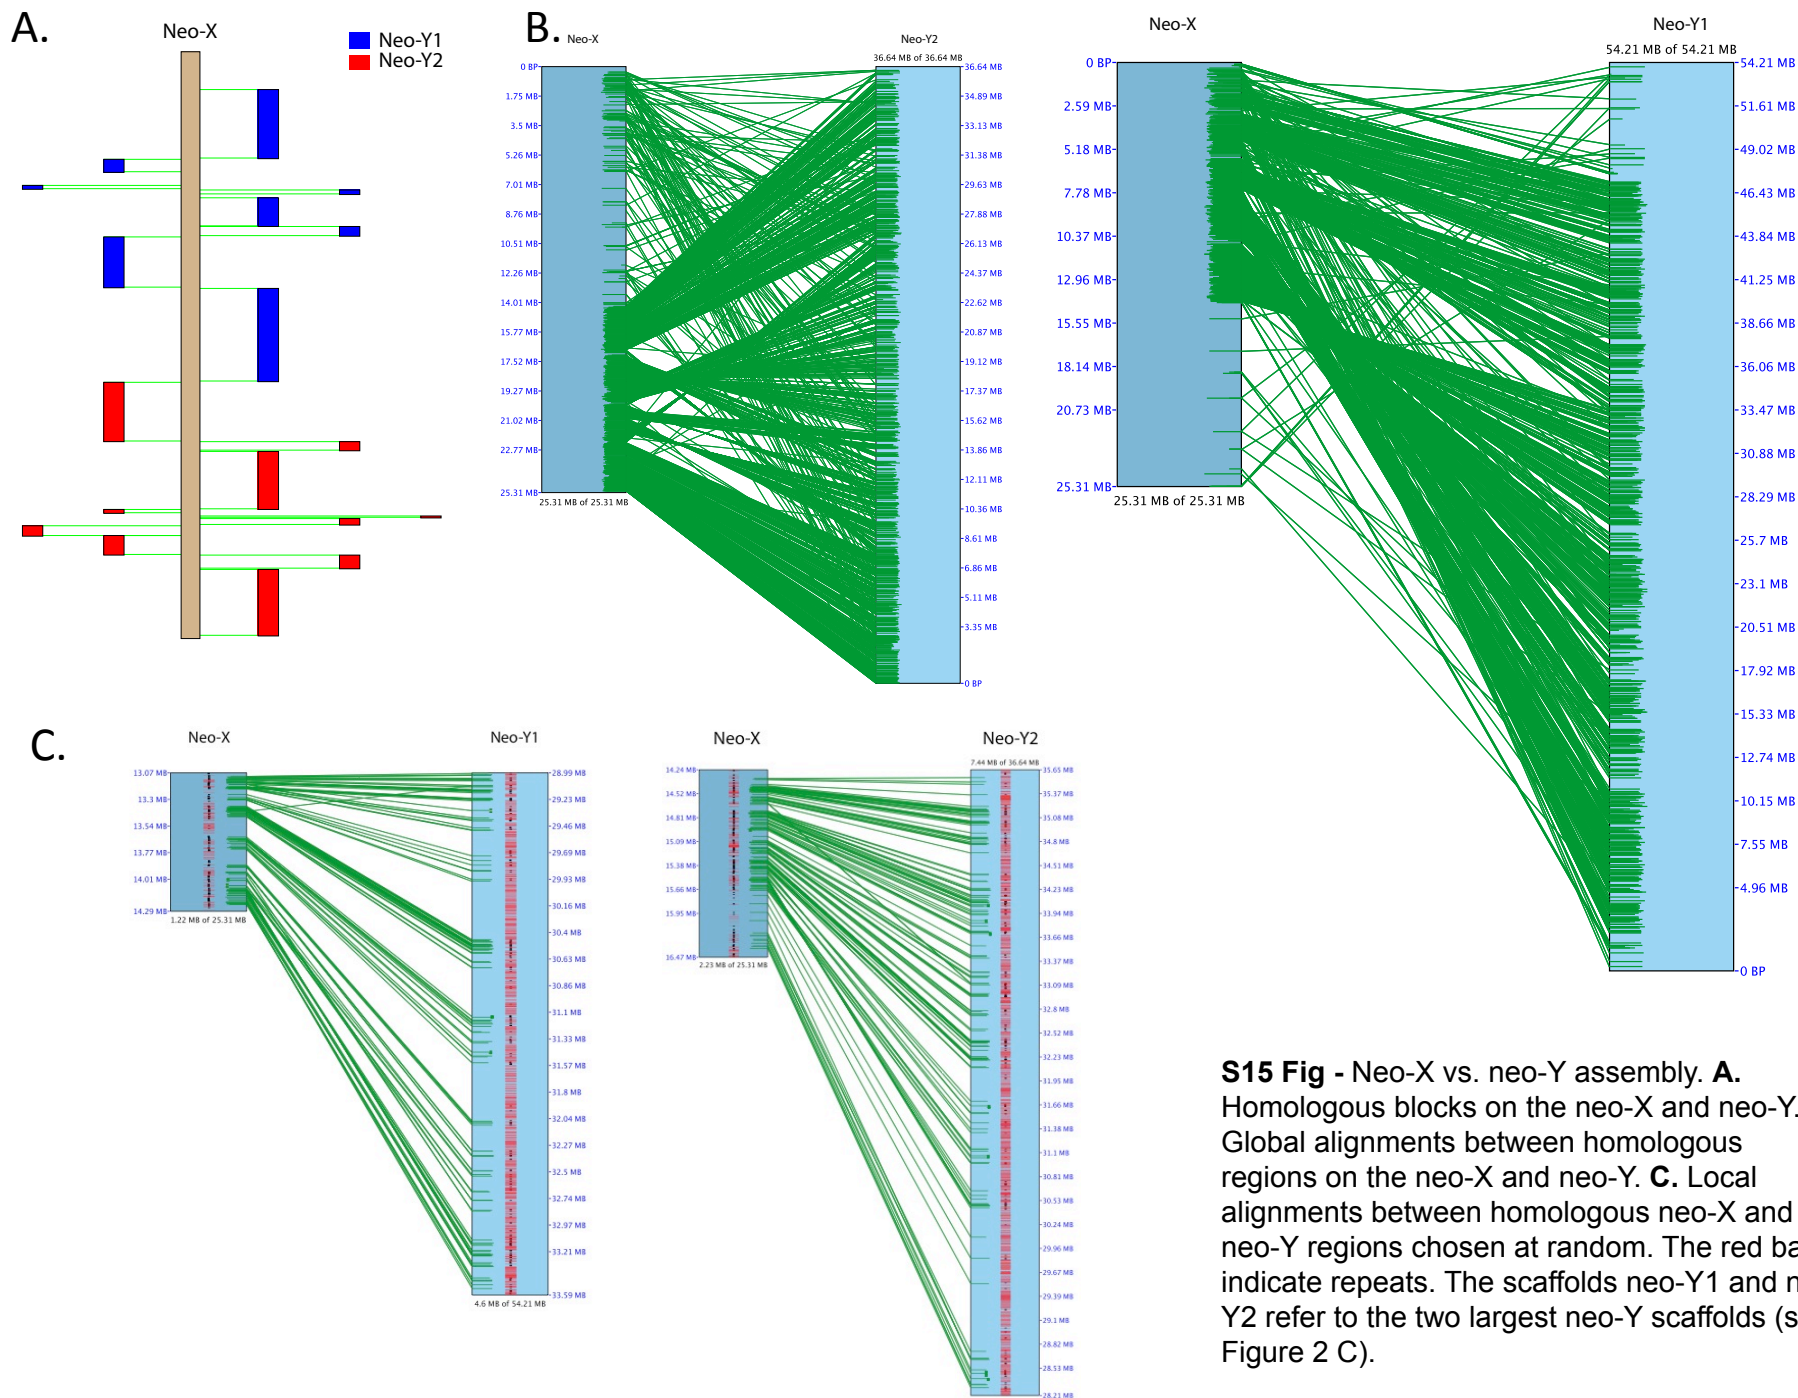

**S15 Fig - Neo-X vs. neo-Y assembly. A.** Homologous blocks on the neo-X and neo-Y. **B.** Global alignments between homologous regions on the neo-X and neo-Y. **C.** Local alignments between homologous neo-X and neo-Y regions chosen at random. The red bars indicate repeats. The scaffolds neo-Y1 and neo-Y2 refer to the two largest neo-Y scaffolds (see Figure 2 C).
