# Supplementary material for: De novo assembly of a young Drosophila Y chromosome using single-molecule sequencing and chromatin conformation capture
Source: PLOS journal article supplement (doi:10.1371/journal.pbio.2006348), 2018-07-30
Supplement: S27 (10.1371/journal.pbio.2006348.s027) [file journal.pbio.2006348.s027]

**S8 Table.** BUSCO analysis of assembly

| BUSCO Scores                          | Assembly stage |                          |                                        |                        |                                                |
|---------------------------------------|----------------|--------------------------|----------------------------------------|------------------------|------------------------------------------------|
|                                       | Canu assembly  | Polished Falcon assembly | Double merged Canu and Falcon assembly | Hi-C-stitched Assembly | Final Assembly after corrections and polishing |
| Complete BUSCOS ( C )                 | 1057           | 1056                     | 1058                                   | 1058                   | 1060                                           |
| Complete and Single copy BUSCOS ( S ) | 897            | 900                      | 902                                    | 911                    | 908                                            |
| Complete and Duplicated BUSCOS ( D )  | 160            | 156                      | 156                                    | 147                    | 152                                            |
| Fragmented BUSCOS ( F )               | 1              | 1                        | 1                                      | 1                      | 1                                              |
| Missing Buscos BUSCOS ( M )           | 8              | 9                        | 7                                      | 7                      | 5                                              |

  

| Assembly stage                                                                    | BUSCO Scores                                  |
|-----------------------------------------------------------------------------------|-----------------------------------------------|
| Canu assembly                                                                     | C:99.1%[S:84.1%,D:15%],F:0.1%,M:0.8%,n:1066   |
| Polished Falcon assembly                                                          | C:99%[S:84.4%,D:14.6%],F:0.1%,M:0.9%,n:1066   |
| Double merged Canu and Falcon assembly                                            | C:99.2%[S:84.6%,D:14.6%],F:0.1%,M:0.7%,n:1066 |
| Hi-C-stitched Assembly                                                            | C:99.3%[S:85.5%,D:13.8%],F:0.1%,M:0.6%,n:1066 |
| Final Assembly after corrections and polishing                                    | C:99.5%[S:85.2%,D:14.3%],F:0.1%,M:0.4%,n:1066 |
| Final Assembly after corrections and polishing with the 3 missing BUSCOS included | C:99.8%[S:85.5%,D:14.3%],F:0.1%,M:0.2%,n:1066 |

\*3 BUSCOS reported as missing in the Final assembly were found to present in the MAKER annotation
